# Supplementary material for: Highly Loaded and Binder-Free Molybdenum Trioxide Cathode Material Prepared Using Multi-Arc Ion Plating for Aqueous Zinc Ion Batteries
Source: MDPI journal article supplement (doi:10.3390/ma15175954), 2022-08-29
Supplement: s1 [file s1]

## Supporting information

# Highly Loaded and Binder-Free Molybdenum Trioxide Cathode Material Prepared Using Multi-Arc Ion Plating for Aqueous Zinc Ion Batteries

Sainan Liu <sup>1,\*</sup>, Yangyang Sun <sup>1</sup>, Jing Yang <sup>1</sup>, Yi Zhang <sup>1,\*</sup> and Zhenyang Cai <sup>2,\*</sup>

<sup>1</sup> School of Minerals Processing and Bioengineering, Central South University, Changsha 410083, China

<sup>2</sup> School of Materials Science and Engineering, Central South University, Changsha 410083, China

\* Correspondence: liusainanbaby@163.com (S.L.); yee\_z10@csu.edu.cn (Y.Z.); csuczy@csu.edu.cn (Z.C.)

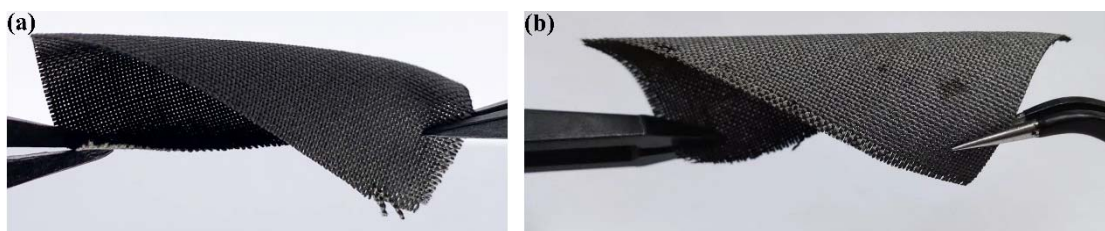

**Figure S1.** Macroscopic morphology of (a) Mo@CFC, (b)  $\alpha$ -MoO<sub>3</sub>@CFC.

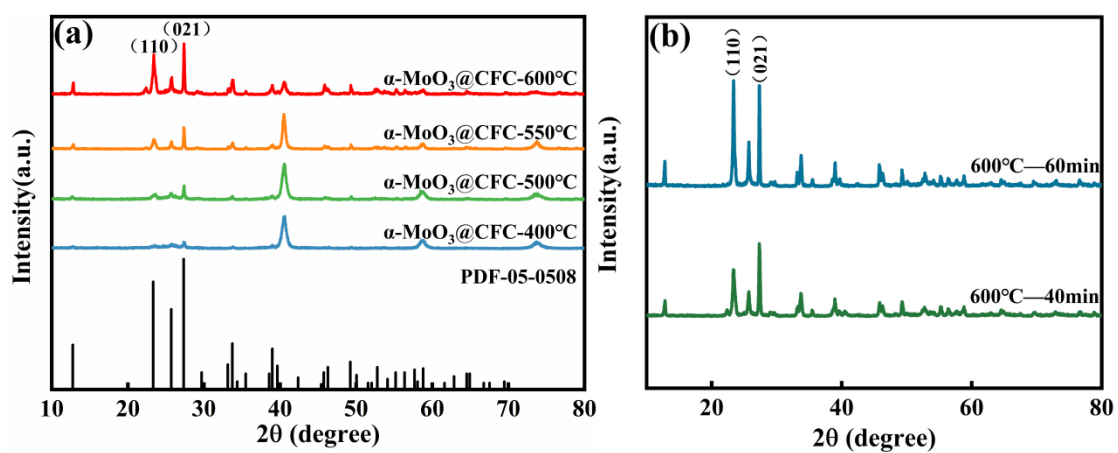

**Figure S2.** XRD patterns of  $\alpha$ -MoO<sub>3</sub>@CFC at (a) different heating temperatures, (b) different heating times at 600°C.

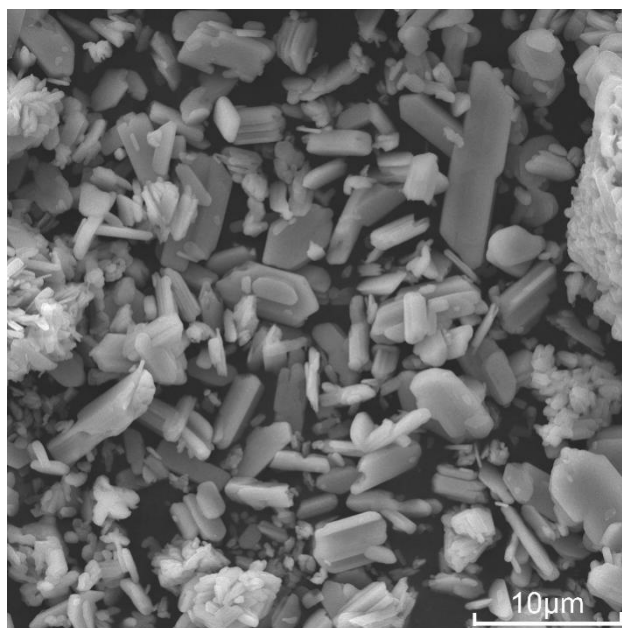

**Figure S3.** SEM image of commercial MoO<sub>3</sub>.

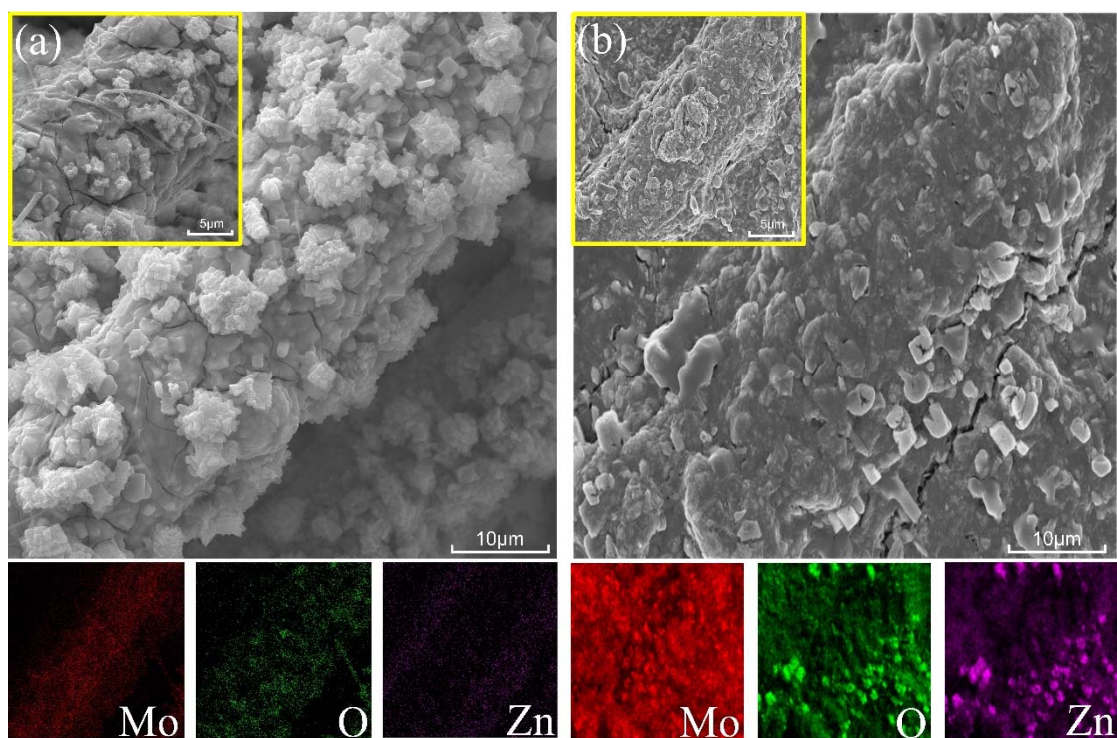

**Figure S4.** The ex-situ SEM images of  $\alpha$ -MoO<sub>3</sub>@CFC(a) and commercial MoO<sub>3</sub>(b) after 20 cycles at a current density of 1 A g<sup>-1</sup>.

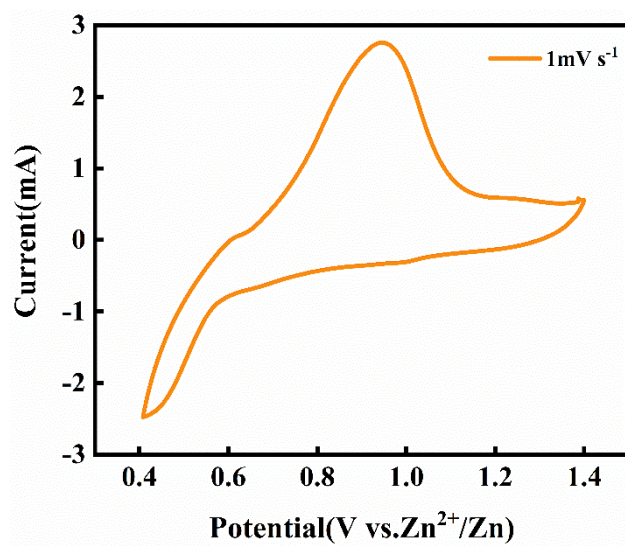

**Figure S5.** 1 mV s<sup>-1</sup> CV curves of commercial MoO<sub>3</sub>.
